# Supplementary material for: CHK1-targeted therapy to deplete DNA replication-stressed, p53-deficient, hyperdiploid colorectal cancer stem cells
Source: PubMed Central journal article supplement — Gut. 2017 Apr 7;67(5):903–17. doi: 10.1136/gutjnl-2016-312623 (PMC5890648; doi:10.1136/gutjnl-2016-312623), 2017-04-07
Supplement: gutjnl-2016-312623supp002.pdf [file gutjnl-2016-312623supp002.pdf]

**TABLE S1. Mutational status of the 16 most commonly mutated genes in colorectal cancer found in our panel of CRC-SCs (COSMIC-reported mutations)**

| Sample_ID <sup>1</sup> | Hugo_Symbol | Protein_Change      | Mutation_Type       | Chromosome  | Start_Position | End_Position | Reference_Allele | Variant_Allele   | Mutation_type_2             | SNP_id                  | COSMIC_ID   | Overall_Coverage | Mutation_Coverage | Allele_Frequency |       |       |
|------------------------|-------------|---------------------|---------------------|-------------|----------------|--------------|------------------|------------------|-----------------------------|-------------------------|-------------|------------------|-------------------|------------------|-------|-------|
| #1                     | KIAA1804    | p.Tyr250Ser         | snv                 | chr1        | 233464523      | 233464523    | A                | A/C              | c.749A>C                    |                         |             | 433              | 128               | 29.56            |       |       |
|                        | KIAA1804    | p.Ser416Phe         | snv                 | chr1        | 233490693      | 233490693    | C                | C/T              | c.1247C>T                   |                         |             | 2619             | 285               | 10.88            |       |       |
|                        | CTNNB1      | p.Ser348Phe         | snv                 | chr3        | 41268805       | 41268805     | C                | C/T              | c.1043C>T                   |                         |             | 1503             | 400               | 26.61            |       |       |
|                        | PIK3CA      | p.Glu453Lys         | snv                 | chr3        | 178928079      | 178928079    | G                | G/A              | c.1357G>A                   |                         | COSM1041484 | 4236             | 2006              | 47.36            |       |       |
|                        | PIK3CA      | p.Leu748Pro         | snv                 | chr3        | 178941924      | 178941924    | T                | T/C              | c.2243T>C                   |                         |             | 1422             | 200               | 14.06            |       |       |
|                        | APC         | p.Ala759AsnfsTer2   | deletion            | chr5        | 112173563      | 112173563    | AAAGCCCTAGAAGC   | AAAGCCCTAGAAGC/A | c.2273_2285delAAGCCCTAGAAGC |                         |             | 6722             | 6557              | 97.55            |       |       |
|                        | TP53        | c.672+1G>C          | snv                 | chr17       | 7578176        | 7578176      | C                | G/G              | c.672+1G>C                  |                         | COSM118939  | 8208             | 8199              | 99.89            |       |       |
|                        | MAP2K4      | p.Phe59Tyr          | snv                 | chr17       | 11958266       | 11958266     | T                | T/A              | c.176T>A                    |                         |             | 876              | 213               | 24.32            |       |       |
|                        | SMAD2       | p.Lys51Ter          | snv                 | chr18       | 45422977       | 45422977     | T                | T/A              | c.151A>T                    |                         |             | 1029             | 149               | 14.48            |       |       |
|                        | #2          | KIAA1804            | p.Phe586Leu         | snv         | chr1           | 233511744    | 233511744        | T                | T/A                         | c.1758T>A               |             |                  | 9259              | 2308             | 24.93 |       |
| KIAA1804               |             | p.Ala722Val         | snv                 | chr1        | 233514917      | 233514917    | C                | C/T              | c.2165C>T                   |                         |             | 4289             | 624               | 14.55            |       |       |
| PIK3CA                 |             | p.Glu579Gly         | snv                 | chr3        | 178937055      | 178937055    | A                | A/G              | c.1736A>G                   |                         |             | 6902             | 908               | 13.16            |       |       |
| PIK3CA                 |             | p.Asn803Ser         | snv                 | chr3        | 178942601      | 178942601    | A                | A/G              | c.2408A>G                   |                         |             | 3011             | 374               | 12.42            |       |       |
| PIK3CA                 |             | p.Ile962Thr         | snv                 | chr3        | 178948113      | 178948113    | T                | T/C              | c.2885T>C                   |                         |             | 9326             | 1311              | 14.06            |       |       |
| FBXW7                  |             | p.Asp119Tyr         | snv                 | chr4        | 153332601      | 153332601    | C                | C/A              | c.355G>T                    | rs200988301             |             | 452              | 307               | 67.92            |       |       |
| APC                    |             | p.Glu202Gly         | snv                 | chr5        | 112116560      | 112116560    | A                | A/G              | c.605A>G                    |                         |             | 2341             | 686               | 29.3             |       |       |
| APC                    |             | p.Lys586Arg         | snv                 | chr5        | 112170661      | 112170661    | A                | A/G              | c.1757A>G                   |                         |             | 3075             | 653               | 21.24            |       |       |
| APC                    |             | p.Leu1021Ile        | snv                 | chr5        | 112174352      | 112174352    | C                | C/A              | c.3061C>A                   |                         |             | 1812             | 487               | 26.88            |       |       |
| APC                    |             | p.Gln1260HisfsTer15 | deletion            | chr5        | 112175069      | 112175069    | CAG              | CAG/C            | c.3779_3780delAG            |                         |             | 129              | 103               | 79.84            |       |       |
| APC                    |             | p.Gln1928Ter        | snv                 | chr5        | 112177073      | 112177073    | C                | C/T              | c.5782C>T                   |                         |             | 13901            | 1515              | 10.9             |       |       |
| APC                    |             | p.Pro2482Ser        | snv                 | chr5        | 112178735      | 112178735    | C                | C/T              | c.7444C>T                   |                         |             | 21701            | 2678              | 12.34            |       |       |
| BRAF                   |             | p.Arg558Ter         | snv                 | chr7        | 140476734      | 140476734    | G                | G/A              | c.1672C>T                   |                         |             | 12757            | 2349              | 18.41            |       |       |
| BRAF                   |             | p.Ala497Val         | snv                 | chr7        | 140477818      | 140477818    | G                | G/A              | c.1490C>T                   |                         |             | 5575             | 1193              | 21.4             |       |       |
| KRAS                   |             | p.Thr20Ala          | snv                 | chr12       | 25398261       | 25398261     | T                | T/C              | c.58A>G                     |                         | COSM1360874 | 134              | 38                | 28.36            |       |       |
| KRAS                   |             | p.Gly12Asp          | snv                 | chr12       | 25398284       | 25398284     | C                | C/T              | c.35G>A                     | rs121913529             | COSM1135366 | 13645            | 10823             | 79.32            |       |       |
| ACVR1B                 |             | p.Ile143Val         | snv                 | chr12       | 52370206       | 52370206     | A                | A/G              | c.427A>G                    |                         |             | 1460             | 912               | 62.47            |       |       |
| TP53                   |             | p.Ser303Asn         | snv                 | chr17       | 7577030        | 7577030      | C                | C/T              | c.908G>A                    |                         | COSM43986   | 3607             | 515               | 14.28            |       |       |
| TP53                   |             | p.Arg248Gln         | snv                 | chr17       | 7577538        | 7577538      | C                | T/T              | c.743G>A                    | rs11540652              | COSM10662   | 978              | 968               | 98.98            |       |       |
| TP53                   |             | p.Arg158Cys         | snv                 | chr17       | 7578458        | 7578458      | G                | G/A              | c.472C>T                    |                         | COSM11087   | 6118             | 4508              | 73.68            |       |       |
| SMAD2                  |             | p.Tyr102ThrfsTer61  | deletion            | chr18       | 45396867       | 45396867     | TA               | TA/T             | c.304delIT                  |                         |             | 4275             | 553               | 12.94            |       |       |
| SMAD4                  |             | p.Pro293Leu         | snv                 | chr18       | 48584800       | 48584800     | C                | C/T              | c.878C>T                    |                         |             | 2907             | 992               | 34.12            |       |       |
| SMAD4                  |             | p.Lys392Ile         | snv                 | chr18       | 48593424       | 48593424     | A                | A/T              | c.1175A>T                   |                         |             | 2060             | 592               | 28.74            |       |       |
| SMAD4                  |             | p.Arg531Trp         | snv                 | chr18       | 48604769       | 48604769     | C                | C/T              | c.1591C>T                   |                         | COSM1389106 | 5491             | 2610              | 47.53            |       |       |
| AMER1                  |             | p.Pro1013His        | snv                 | chrX        | 63410129       | 63410129     | G                | G/T              | c.3038C>A                   |                         |             | 11314            | 1931              | 17.07            |       |       |
| AMER1                  | p.Ala150Thr | snv                 | chrX                | 63412719    | 63412719       | C            | C/T              | c.448G>A         |                             |                         | 8946        | 1195             | 13.36             |                  |       |       |
| #3                     | PIK3CA      | p.Gly118Asp         | snv                 | chr3        | 178917478      | 178917478    | G                | G/A              | c.353G>A                    |                         | COSM246588  | 3736             | 1699              | 45.48            |       |       |
|                        | PIK3CA      | p.Gly865Ser         | snv                 | chr3        | 178947157      | 178947157    | G                | G/A              | c.2593G>A                   |                         |             | 5614             | 1493              | 26.59            |       |       |
|                        | APC         | p.Tyr935Ter         | snv                 | chr5        | 112174096      | 112174096    | C                | C/A              | c.2805C>A                   | rs137854575             | COSM19031   | 3522             | 2088              | 59.28            |       |       |
|                        | APC         | p.Gln1429Ter        | snv                 | chr5        | 112175576      | 112175576    | C                | C/T              | c.4285C>T                   | rs121913330, rs74535574 | COSM18836   | 2173             | 731               | 33.64            |       |       |
|                        | KRAS        | p.Gly12Asp          | snv                 | chr12       | 25398284       | 25398284     | C                | T/T              | c.35G>A                     | rs121913529             | COSM1135366 | 14256            | 14191             | 99.54            |       |       |
|                        | TP53        | p.Arg175His         | snv                 | chr17       | 7578406        | 7578406      | C                | T/T              | c.524G>A                    | rs28934578              | COSM10648   | 7983             | 7948              | 99.56            |       |       |
|                        | #4          | CTNNB1              | p.Glu15Lys          | snv         | chr3           | 41266046     | 41266046         | G                | G/A                         | c.43G>A                 |             | COSM49161        | 4740              | 539              | 11.37 |       |
|                        |             | APC                 | p.Ser873LeufsTer43  | deletion    | chr5           | 112173906    | 112173906        | CT               | CT/C                        | c.2616delT              |             |                  | 11093             | 11036            | 99.49 |       |
|                        |             | APC                 | p.Arg2439His        | snv         | chr5           | 112178607    | 112178607        | G                | G/A                         | c.7316G>A               |             |                  | 7569              | 4075             | 53.84 |       |
|                        |             | TP53                | p.Arg306Ter         | snv         | chr17          | 7577022      | 7577022          | G                | G/A                         | c.916C>T                | rs121913344 | COSM10663        | 2551              | 1251             | 49.04 |       |
| AMER1                  |             | p.Pro876Ser         | snv                 | chrX        | 63410541       | 63410541     | G                | G/A              | c.2626C>T                   |                         |             | 562              | 60                | 10.68            |       |       |
| #5                     |             | FBXW7               | p.Arg465His         | snv         | chr4           | 153249384    | 153249384        | C                | C/T                         | c.1394G>A               |             | COSM1149856      | 1556              | 862              | 55.4  |       |
|                        |             | APC                 | p.Cys1387Ter        | snv         | chr5           | 112175452    | 112175452        | T                | A/A                         | c.4161T>A               |             | COSM18806        | 6166              | 6146             | 99.68 |       |
|                        |             | #6                  | PIK3CA              | p.Arg38Cys  | snv            | chr3         | 178916725        | 178916725        | C                           | C/T                     | c.112C>T    |                  | COSM1041448       | 1820             | 772   | 42.42 |
|                        |             |                     | APC                 | p.Arg374Gln | snv            | chr5         | 112154850        | 112154850        | G                           | G/A                     | c.1121G>A   | rs141582813      |                   | 11206            | 5654  | 50.46 |
|                        |             |                     | APC                 | p.Arg805Ter | snv            | chr5         | 112173704        | 112173704        | C                           | C/T                     | c.2413C>T   |                  | COSM19058         | 7811             | 4357  | 55.78 |
|                        | APC         |                     | p.Glu1464ValfsTer8  | deletion    | chr5           | 112175675    | 112175675        | AAGAG            | AAGAG/A                     | c.4385_4388delAAGAG     | rs387906235 | COSM1432412      | 9389              | 4640             | 49.42 |       |
|                        | PTEN        |                     | p.Lys267ArgfsTer9   | deletion    | chr10          | 89717769     | 89717769         | TA               | TA/T                        | c.795delA               | rs121913289 | COSM30622        | 10858             | 5210             | 47.98 |       |
|                        | PTEN        |                     | p.Asn323MetfsTer21  | deletion    | chr10          | 89720811     | 89720811         | CA               | CA/C                        | c.963delA               | rs121913291 | COSM5823         | 9600              | 4779             | 49.78 |       |
|                        | TP53        |                     | p.Arg267Gln         | snv         | chr17          | 7577138      | 7577138          | C                | C/T                         | c.800G>A                |             | COSM11392        | 3640              | 1974             | 54.23 |       |
|                        | #7          |                     | KIAA1804            | p.Ala374Val | snv            | chr1         | 233489687        | 233489687        | C                           | C/T                     | c.1121C>T   |                  |                   | 1466             | 325   | 22.17 |
| KIAA1804               |             |                     | p.Arg535Pro         | snv         | chr1           | 233507835    | 233507835        | G                | G/C                         | c.1604G>C               |             |                  | 1424              | 150              | 10.53 |       |
| KIAA1804               |             |                     | p.Ser954Leu         | snv         | chr1           | 233518207    | 233518207        | C                | C/T                         | c.2861C>T               |             |                  | 2299              | 232              | 10.09 |       |
| CTNNB1                 |             | p.Cys439Tyr         | snv                 | chr3        | 41275150       | 41275150     | G                | G/A              | c.1316G>A                   |                         |             | 10648            | 4186              | 39.31            |       |       |
| FBXW7                  |             | p.Ser668ValfsTer39  | deletion            | chr4        | 153244155      | 153244155    | TC               | TC/T             | c.2001delG                  |                         | COSM1427622 | 15666            | 7521              | 48.01            |       |       |
| FBXW7                  |             | p.Glu117del         | deletion            | chr4        | 153332604      | 153332604    | TCTC             | TCTC/T           | c.349_351delGAG             |                         | COSM22937   | 1892             | 206               | 10.89            |       |       |
| APC                    |             | p.Arg876Ter         | snv                 | chr5        | 112043458      | 112043458    | C                | C/T              | c.2626C>T                   | rs121913333             | COSM18852   | 20414            | 11008             | 53.92            |       |       |
| APC                    |             | p.Ser1465TrpfsTer3  | deletion            | chr5        | 112175675      | 112175675    | AAG              | AAG/A            | c.4385_4388delAG            | rs387906234             | COSM18873   | 21063            | 10292             | 48.86            |       |       |
| BRAF                   |             | c.1861-1G>A         | snv                 | chr7        | 140449219      | 140449219    | C                | C/T              | c.1861-1G>A                 |                         |             | 3408             | 494               | 14.5             |       |       |
| TCF7L2                 |             | p.Leu200SerfsTer25  | deletion            | chr10       | 114900983      | 114900983    | AC               | AC/A             | c.594delC                   |                         | COSM1345824 | 3155             | 700               | 22.19            |       |       |
| #8                     | SMAD4       | p.Arg38Lys          | snv                 | chr18       | 48573529       | 48573529     | G                | G/A              | c.113G>A                    |                         |             | 2926             | 427               | 14.59            |       |       |
|                        | PIK3CA      | p.His1047Arg        | snv                 | chr3        | 178952085      | 178952085    | A                | A/G              | c.3140A>G                   | rs121913279             | COSM249874  | 5413             | 2623              | 48.46            |       |       |
|                        | FBXW7       | p.Ala626Val         | snv                 | chr4        | 153244280      | 153244280    | G                | G/A              | c.1877C>T                   |                         | COSM1427640 | 2452             | 1241              | 50.61            |       |       |
|                        | KRAS        | p.Gly12Val          | snv                 | chr12       | 25398284       | 25398284     | C                | C/A              | c.35G>T                     | rs121913529             | COSM1135366 | 20083            | 12859             | 64.03            |       |       |
|                        | SMAD4       | p.Gln366Ter         | snv                 | chr18       | 48591933       | 48591933     | C                | C/T              | c.1096C>T                   |                         | COSM30781   | 10071            | 5230              | 51.93            |       |       |
|                        | SMAD4       | p.Arg497His         | snv                 | chr18       | 48604668       | 48604668     | G                | G/A              | c.1490G>A                   |                         | COSM14113   | 5947             | 2969              | 49.92            |       |       |
|                        | #9          | KIAA1804            | p.Pro552Leu         | snv         | chr1           | 233507886    | 233507886        | C                | C/T                         | c.1655C>T               |             |                  | 120               | 14               | 11.67 |       |
|                        |             | APC                 | p.Arg805Ter         | snv         | chr5           | 112173704    | 112173704        | C                | C/T                         | c.2413C>T               |             | COSM19058        | 6936              | 4362             | 62.89 |       |
|                        |             | APC                 | p.Ser1581LeufsTer69 | deletion    | chr5           | 112176029    | 112176029        | AT               | AT/A                        | c.4739delIT             |             | COSM1432454      | 4531              | 1772             | 39.11 |       |
|                        |             | TCF7L2              | p.Thr228Pro         | snv         | chr10          | 114901072    | 114901072        | A                | A/C                         | c.682A>C                |             |                  | 105               | 16               | 15.24 |       |
| KRAS                   |             | p.Gly13Asp          | snv                 | chr12       | 25398281       | 25398281     | C                | T/T              | c.38G>A                     | rs112445441             | COSM1140132 | 5318             | 5290              | 99.47            |       |       |
| TP53                   |             | p.His179Gln         | snv                 | chr17       | 7578393        | 7578393      | A                | A/T              | c.537T>A                    |                         | COSM11249   | 3552             | 3504              | 98.65            |       |       |
| #10                    |             | KIAA1804            | p.Lys317Arg         | snv         | chr1           | 233482332    | 233482332        | A                | A/G                         | c.950A>G                |             |                  | 4264              | 841              | 19.72 |       |
|                        |             | KIAA1804            | p.Thr783Ala         | snv         | chr1           | 233515099    | 233515099        | A                | A/G                         | c.2347A>G               |             |                  | 122               | 14               | 11.48 |       |
|                        |             | KIAA1804            | p.Asp816ThrfsTer135 | deletion    | chr1           | 233515196    | 233515196        | TG               | TG/T                        | c.2445delG              |             |                  | 742               | 100              | 13.48 |       |
|                        |             | KIAA1804            | p.Phe838Leu         | snv         |                |              |                  |                  |                             |                         |             |                  |                   |                  |       |       |

| Sample_ID <sup>1</sup> | Hugo_Symbol | Protein_Change     | Mutation_Type | Chromosome | Start_Position | End_Position | Reference_Allele | Variant_Allele | Mutation_type_2   | SNP_id                  | COSMIC_ID   | Overall_Coverage | Mutation_Coverage | Allele_Frequency |
|------------------------|-------------|--------------------|---------------|------------|----------------|--------------|------------------|----------------|-------------------|-------------------------|-------------|------------------|-------------------|------------------|
|                        | APC         | p.Lys2819Arg       | snv           | chr5       | 112179747      | 112179747    | A                | A/G            | c.8456A>G         |                         |             | 586              | 72                | 12.29            |
|                        | ACVR1B      | p.Asn150Ile        | snv           | chr12      | 52370228       | 52370228     | A                | A/T            | c.449A>T          |                         |             | 428              | 50                | 11.68            |
|                        | ACVR1B      | p.Ile481Thr        | snv           | chr12      | 52385704       | 52385704     | T                | T/C            | c.1442T>C         |                         |             | 547              | 72                | 13.16            |
|                        | TP53        | p.Arg196Ter        | snv           | chr17      | 7578263        | 7578263      | G                | A/A            | c.586C>T          |                         | COSM10705   | 6246             | 6182              | 98.98            |
|                        | MAP2K4      | p.Phe314Ser        | snv           | chr17      | 12032505       | 12032505     | T                | T/C            | c.941T>C          |                         |             | 173              | 90                | 52.02            |
|                        | SMAD2       | p.Cys412Arg        | snv           | chr18      | 45371757       | 45371757     | A                | A/G            | c.1234T>C         |                         |             | 226              | 57                | 25.22            |
|                        | SMAD4       | p.Ile545Thr        | snv           | chr18      | 48604812       | 48604812     | T                | T/C            | c.1634T>C         |                         |             | 1173             | 205               | 17.48            |
|                        | AMER1       | p.Ala836Pro        | snv           | chrX       | 63410661       | 63410661     | C                | C/G            | c.2506G>C         |                         |             | 422              | 58                | 13.74            |
| #12                    | PIK3CA      | p.Leu443Ser        | snv           | chr3       | 178928050      | 178928050    | T                | T/C            | c.1328T>C         |                         |             | 5057             | 2601              | 51.43            |
|                        | PIK3CA      | p.Glu545Lys        | snv           | chr3       | 178936091      | 178936091    | G                | G/A            | c.1633G>A         | rs104886003             | COSM125370  | 753              | 383               | 50.86            |
|                        | BRAF        | p.Val600Glu        | snv           | chr7       | 140453136      | 140453136    | A                | A/T            | c.1799T>A         | rs113488022             | COSM18443   | 16211            | 10640             | 65.63            |
|                        | SMAD2       | p.Arg182Ter        | snv           | chr18      | 45394805       | 45394805     | G                | G/A            | c.544C>T          |                         |             | 2131             | 1457              | 68.37            |
|                        | AMER1       | p.Arg699His        | snv           | chrX       | 63411071       | 63411071     | C                | C/T            | c.2096G>A         |                         |             | 2210             | 1280              | 57.92            |
| #13                    | PIK3CA      | p.Glu542Lys        | snv           | chr3       | 178936082      | 178936082    | G                | A/A            | c.1624G>A         | rs121913273             | COSM125369  | 1169             | 1165              | 99.66            |
|                        | APC         | p.Thr182IlefsTer2  | deletion      | chr5       | 112116494      | 112116494    | TACAA            | TACAA/T        | c.540_543delACAA  |                         |             | 9299             | 4146              | 44.59            |
|                        | APC         | p.Arg259Trp        | snv           | chr5       | 112137021      | 112137021    | C                | C/T            | c.775C>T          |                         |             | 3996             | 2265              | 56.68            |
|                        | APC         | p.Glu1284Ter       | snv           | chr5       | 112175141      | 112175141    | G                | G/T            | c.3850G>T         |                         | COSM19069   | 9807             | 6156              | 62.77            |
|                        | APC         | p.Glu1317Gln       | snv           | chr5       | 112175240      | 112175240    | G                | G/C            | c.3949G>C         | rs1801166               | COSM19099   | 15300            | 6032              | 39.42            |
|                        | TCF7L2      | p.Leu200ProfsTer10 | insertion     | chr10      | 114900983      | 114900983    | A                | A/AC           | c.593_594insC     |                         |             | 4558             | 2157              | 47.32            |
|                        | SMAD4       | p.Arg361Cys        | snv           | chr18      | 48591918       | 48591918     | C                | T/T            | c.1081C>T         | rs80338963              | COSM1158192 | 11068            | 11017             | 99.54            |
| #14                    | KIAA1804    | p.Arg345GlyfsTer12 | deletion      | chr1       | 233489598      | 233489598    | TC               | TC/T           | c.1033delC        |                         |             | 13900            | 9961              | 71.66            |
|                        | FBXW7       | p.Lys647Glu        | snv           | chr4       | 153244218      | 153244218    | T                | T/C            | c.1939A>G         |                         |             | 8075             | 3936              | 48.74            |
|                        | APC         | p.Ala199Val        | snv           | chr5       | 112116551      | 112116551    | C                | C/T            | c.596C>T          |                         | COSM201287  | 7847             | 3945              | 50.27            |
|                        | APC         | p.Gly2250Asp       | snv           | chr5       | 112178040      | 112178040    | G                | G/A            | c.6749G>A         |                         |             | 12450            | 6248              | 50.18            |
|                        | PTEN        | p.Asn323MetfsTer21 | deletion      | chr10      | 89720811       | 89720811     | CA               | CA/C           | c.963delA         | rs121913291             | COSM5823    | 14576            | 7415              | 50.87            |
|                        | TCF7L2      | p.Ser569ProfsTer33 | deletion      | chr10      | 114925621      | 114925621    | GC               | GC/G           | c.1700delC        |                         |             | 7268             | 4338              | 59.69            |
|                        | KRAS        | p.Gly12Val         | snv           | chr12      | 25398284       | 25398284     | C                | C/A            | c.35G>T           | rs121913529             | COSM1135366 | 25468            | 12357             | 48.52            |
|                        | ACVR1B      | p.Trp501Ter        | snv           | chr12      | 52385765       | 52385765     | G                | G/A            | c.1503G>A         |                         |             | 14867            | 7559              | 50.84            |
|                        | TP53        | p.Asp148Ter        | insertion     | chr17      | 7578488        | 7578488      | C                | C/CA           | c.441dupT         |                         | COSM44778   | 4826             | 1983              | 41.09            |
| #15                    | APC         | p.Arg283Ter        | snv           | chr5       | 112151204      | 112151204    | C                | C/T            | c.847C>T          |                         | COSM19679   | 17202            | 7900              | 45.92            |
|                        | APC         | p.Ser1415ArgfsTer4 | deletion      | chr5       | 112175535      | 112175535    | GT               | GT/G           | c.4245delT        |                         | COSM18952   | 26020            | 12432             | 47.78            |
|                        | PTEN        | p.Val54Ala         | snv           | chr10      | 89653863       | 89653863     | T                | T/C            | c.161T>C          |                         | COSM1349482 | 7509             | 4070              | 54.2             |
|                        | KRAS        | p.Ala146Thr        | snv           | chr12      | 25378562       | 25378562     | C                | C/T            | c.436G>A          | rs121913527             | COSM1165198 | 22892            | 19124             | 83.54            |
|                        | TP53        | p.Trp23Arg         | snv           | chr17      | 7579846        | 7579846      | A                | A/G            | c.67T>C           |                         |             | 248              | 35                | 14.11            |
|                        | SMAD4       | p.Arg361Cys        | snv           | chr18      | 48591918       | 48591918     | C                | T/T            | c.1081C>T         | rs80338963              | COSM1158192 | 4931             | 4921              | 99.8             |
| #16                    | KIAA1804    | p.Glu563Asp        | snv           | chr1       | 233511675      | 233511675    | A                | A/C            | c.1689A>C         | rs35758282              |             | 17251            | 9381              | 54.38            |
|                        | FBXW7       | p.Gln612Leu        | snv           | chr4       | 153245356      | 153245356    | T                | T/A            | c.1835A>T         |                         |             | 2755             | 693               | 25.15            |
|                        | FBXW7       | p.Glu316Lys        | snv           | chr4       | 153253787      | 153253787    | C                | C/T            | c.946G>A          |                         |             | 559              | 236               | 42.22            |
|                        | APC         | p.Gly265Glu        | snv           | chr5       | 112137040      | 112137040    | G                | G/A            | c.794G>A          |                         |             | 1846             | 375               | 20.31            |
|                        | APC         | p.Arg876Ter        | snv           | chr5       | 112173917      | 112173917    | C                | C/T            | c.2626C>T         | rs121913333             | COSM18852   | 11533            | 7266              | 63               |
|                        | APC         | p.Gln1429Ter       | snv           | chr5       | 112175576      | 112175576    | C                | C/T            | c.4285C>T         | rs121913330, rs74535574 | COSM18836   | 24064            | 10214             | 42.45            |
|                        | TCF7L2      | p.Lys45Thr         | snv           | chr10      | 114710649      | 114710649    | A                | A/C            | c.134A>C          |                         |             | 1271             | 559               | 43.98            |
|                        | KRAS        | p.Gly12Cys         | snv           | chr12      | 25398285       | 25398285     | C                | C/A            | c.34G>T           | rs121913530             | COSM1140136 | 4515             | 2937              | 65.05            |
|                        | ACVR1B      | p.Gly194Arg        | snv           | chr12      | 52370359       | 52370359     | G                | G/A            | c.580G>A          |                         |             | 4056             | 667               | 16.44            |
|                        | TP53        | p.Arg248Gln        | snv           | chr17      | 7577538        | 7577538      | C                | T/T            | c.743G>A          | rs11540652              | COSM10662   | 1320             | 1312              | 99.39            |
|                        | SMAD4       | p.Asp355Gly        | snv           | chr18      | 48591901       | 48591901     | A                | G/G            | c.1064A>G         |                         | COSM14232   | 4204             | 4201              | 99.93            |
|                        | SMAD4       | p.Pro514Gln        | snv           | chr18      | 48604719       | 48604719     | C                | C/A            | c.1541C>A         |                         |             | 2956             | 378               | 12.79            |
|                        | AMER1       | p.Tyr599Cys        | snv           | chrX       | 63411371       | 63411371     | T                | T/C            | c.1796A>G         | rs144896730             |             | 1811             | 412               | 22.75            |
| #17                    | KIAA1804    | p.His118Tyr        | snv           | chr1       | 233464126      | 233464126    | C                | C/T            | c.352C>T          |                         |             | 264              | 137               | 51.89            |
|                        | KRAS        | p.Ala146Thr        | snv           | chr12      | 25378562       | 25378562     | C                | C/T            | c.436G>A          | rs121913527             | COSM1165198 | 36566            | 30593             | 83.67            |
|                        | TP53        | p.Val272Leu        | snv           | chr17      | 7577124        | 7577124      | C                | A/A            | c.814G>T          | rs121912657             | COSM10859   | 960              | 958               | 99.79            |
| #18                    | NRAS        | p.Asn1161Tyr       | snv           | chr1       | 115252294      | 115252294    | T                | T/A            | c.346A>T          |                         |             | 566              | 341               | 60.25            |
|                        | CTNNB1      | p.Arg225His        | snv           | chr3       | 41267003       | 41267003     | G                | G/A            | c.674G>A          | rs144087793             |             | 3419             | 1711              | 50.04            |
|                        | FBXW7       | p.Val555Leu        | snv           | chr4       | 153245528      | 153245528    | C                | C/A            | c.1663G>T         |                         |             | 2478             | 897               | 36.2             |
|                        | FBXW7       | p.Arg479Gln        | snv           | chr4       | 153247366      | 153247366    | C                | C/T            | c.1436G>A         |                         | COSM1133712 | 7157             | 3783              | 52.86            |
|                        | APC         | p.Thr1556AsnfsTer3 | insertion     | chr5       | 112175951      | 112175951    | G                | G/GA           | c.4660_4661insA   |                         |             | 6090             | 4336              | 71.2             |
|                        | BRAF        | p.Val600Glu        | snv           | chr7       | 140453136      | 140453136    | A                | A/T            | c.1799T>A         | rs113488022             | COSM18443   | 19800            | 10587             | 53.47            |
|                        | PTEN        | p.Gly143Asp        | snv           | chr10      | 89692944       | 89692944     | G                | G/A            | c.428G>A          |                         |             | 4684             | 641               | 13.68            |
|                        | PTEN        | p.Lys267ArgfsTer9  | deletion      | chr10      | 89717769       | 89717769     | TA               | TA/T           | c.795delA         | rs121913289             | COSM30622   | 5736             | 3635              | 63.37            |
|                        | TCF7L2      | p.Pro199His        | snv           | chr10      | 114900986      | 114900986    | C                | C/A            | c.596C>A          |                         |             | 1932             | 335               | 17.34            |
|                        | ACVR1B      | p.Pro279Leu        | snv           | chr12      | 52376494       | 52376494     | C                | C/T            | c.836C>T          |                         |             | 1582             | 257               | 16.25            |
|                        | TP53        | p.His178ThrfsTer69 | deletion      | chr17      | 7578397        | 7578397      | TG               | TG/T           | c.532delC         | rs68130327              | COSM111495  | 2320             | 450               | 19.4             |
|                        | TP53        | p.Arg175Cys        | snv           | chr17      | 7578407        | 7578407      | G                | G/A            | c.523C>T          | rs138729528             | COSM10870   | 2319             | 1135              | 48.94            |
|                        | SMAD2       | p.Glu185Gly        | snv           | chr18      | 45394795       | 45394795     | T                | T/C            | c.554A>G          |                         |             | 1297             | 135               | 10.41            |
|                        | SMAD4       | p.Ala309Thr        | snv           | chr18      | 48586256       | 48586256     | G                | G/A            | c.925G>A          |                         |             | 3194             | 483               | 15.12            |
|                        | SMAD4       | p.Ala463GlyfsTer13 | deletion      | chr18      | 48603086       | 48603086     | GC               | GC/G           | c.1388delC        |                         |             | 439              | 61                | 13.9             |
| #19                    | AMER1       | p.His1025Tyr       | snv           | chrX       | 63410094       | 63410094     | G                | G/A            | c.3073C>T         |                         |             | 2702             | 295               | 10.92            |
|                        | NRAS        | p.Ala134Val        | snv           | chr1       | 115252239      | 115252239    | G                | G/A            | c.401C>T          |                         |             | 9299             | 1188              | 12.78            |
|                        | KIAA1804    | p.Val168Met        | snv           | chr1       | 233464276      | 233464276    | G                | G/A            | c.502G>A          |                         |             | 911              | 151               | 16.58            |
|                        | KIAA1804    | p.Gly594Glu        | snv           | chr1       | 233511767      | 233511767    | G                | G/A            | c.1781G>A         |                         |             | 12211            | 1780              | 14.58            |
|                        | KIAA1804    | p.Ser643Pro        | snv           | chr1       | 233514679      | 233514679    | T                | T/C            | c.1927T>C         |                         |             | 3317             | 380               | 11.46            |
|                        | KIAA1804    | p.Pro980Ser        | snv           | chr1       | 233518284      | 233518284    | C                | C/T            | c.2938C>T         |                         |             | 6221             | 627               | 10.08            |
|                        | KIAA1804    | p.Ser1008Cys       | snv           | chr1       | 233518368      | 233518368    | A                | A/T            | c.3022A>T         |                         |             | 2333             | 289               | 12.39            |
|                        | CTNNB1      | p.Tyr331Cys        | snv           | chr3       | 41268754       | 41268754     | A                | A/G            | c.992A>G          |                         |             | 2430             | 266               | 10.95            |
|                        | CTNNB1      | p.Glu479Gly        | snv           | chr3       | 41275270       | 41275270     | A                | A/G            | c.1436A>G         |                         |             | 3920             | 439               | 11.2             |
|                        | PIK3CA      | p.His578Arg        | snv           | chr3       | 41277264       | 41277264     | A                | A/G            | c.1733A>G         |                         |             | 478              | 71                | 14.85            |
|                        | APC         | p.Arg765Trp        | snv           | chr3       | 178941974      | 178941974    | A                | A/T            | c.2293A>T         |                         |             | 571              | 62                | 10.86            |
|                        | APC         | p.His1013Arg       | snv           | chr5       | 112174329      | 112174329    | A                | A/G            | c.3038A>G         |                         |             | 8008             | 3296              | 41.16            |
|                        | APC         | p.Tyr1135Ter       | deletion      | chr5       | 112174693      | 112174693    | CTA              | CTA/C          | c.3403_3404delITA |                         |             | 4199             | 1941              | 46.23            |
|                        | APC         | p.Gln1406Ter       | snv</         |            |                |              |                  |                |                   |                         |             |                  |                   |                  |

| Sample_ID <sup>1</sup>                                                                                                                                                                                                                                                                                                                                                                                      | Hugo_Symbol                                                                                            | Protein_Change     | Mutation_Type | Chromosome | Start_Position | End_Position | Reference_Allele | Variant_Allele | Mutation_type_2  | SNP_id      | COSMIC_ID   | Overall_Coverage | Mutation_Coverage | Allele_Frequency |
|-------------------------------------------------------------------------------------------------------------------------------------------------------------------------------------------------------------------------------------------------------------------------------------------------------------------------------------------------------------------------------------------------------------|--------------------------------------------------------------------------------------------------------|--------------------|---------------|------------|----------------|--------------|------------------|----------------|------------------|-------------|-------------|------------------|-------------------|------------------|
|                                                                                                                                                                                                                                                                                                                                                                                                             | PTEN                                                                                                   | p.Glu114Lys        | snv           | chr10      | 89692856       | 89692856     | G                | G/A            | c.340G>A         |             | COSM5320    | 6311             | 1199              | 19               |
|                                                                                                                                                                                                                                                                                                                                                                                                             | TCF7L2                                                                                                 | p.Pro69Ser         | snv           | chr10      | 114710981      | 114710981    | C                | C/T            | c.205C>T         |             |             | 2450             | 433               | 17.67            |
|                                                                                                                                                                                                                                                                                                                                                                                                             | TCF7L2                                                                                                 | p.His255Tyr        | snv           | chr10      | 114903759      | 114903759    | C                | C/T            | c.763C>T         |             |             | 1345             | 502               | 37.32            |
|                                                                                                                                                                                                                                                                                                                                                                                                             | TCF7L2                                                                                                 | p.Phe276Ile        | snv           | chr10      | 114905807      | 114905807    | T                | T/A            | c.826T>A         |             |             | 1374             | 327               | 23.8             |
|                                                                                                                                                                                                                                                                                                                                                                                                             | TCF7L2                                                                                                 | p.Ala507Val        | snv           | chr10      | 114925442      | 114925442    | C                | C/T            | c.1520C>T        |             |             | 1993             | 401               | 20.12            |
|                                                                                                                                                                                                                                                                                                                                                                                                             | KRAS                                                                                                   | p.Thr148Ile        | snv           | chr12      | 25378555       | 25378555     | G                | G/A            | c.443C>T         |             |             | 8231             | 1039              | 12.62            |
|                                                                                                                                                                                                                                                                                                                                                                                                             | ACVR1B                                                                                                 | p.Met514Ile        | snv           | chr12      | 52387795       | 52387795     | G                | G/T            | c.1542G>T        |             |             | 3626             | 567               | 15.64            |
|                                                                                                                                                                                                                                                                                                                                                                                                             | TP53                                                                                                   | p.Arg273His        | snv           | chr17      | 7577120        | 7577120      | C                | T/T            | c.818G>A         | rs28934576  | COSM10660   | 2589             | 2580              | 99.65            |
|                                                                                                                                                                                                                                                                                                                                                                                                             | SMAD4                                                                                                  | p.Ala36Thr         | snv           | chr18      | 48573522       | 48573522     | G                | G/A            | c.106G>A         |             |             | 1352             | 234               | 17.31            |
|                                                                                                                                                                                                                                                                                                                                                                                                             | SMAD4                                                                                                  | p.Ser42Gly         | snv           | chr18      | 48573540       | 48573540     | A                | A/G            | c.124A>G         |             |             | 1356             | 192               | 14.16            |
|                                                                                                                                                                                                                                                                                                                                                                                                             | SMAD4                                                                                                  | p.Ile179Val        | snv           | chr18      | 48581231       | 48581231     | A                | A/G            | c.535A>G         |             | COSM318051  | 1253             | 182               | 14.53            |
|                                                                                                                                                                                                                                                                                                                                                                                                             | SMAD4                                                                                                  | p.Thr181Ala        | snv           | chr18      | 48581237       | 48581237     | A                | A/G            | c.541A>G         |             |             | 1256             | 243               | 19.35            |
|                                                                                                                                                                                                                                                                                                                                                                                                             | SMAD4                                                                                                  | p.Gln311Ter        | snv           | chr18      | 48586262       | 48586262     | C                | T/T            | c.931C>T         |             | COSM14163   | 8982             | 8953              | 99.68            |
|                                                                                                                                                                                                                                                                                                                                                                                                             | SMAD4                                                                                                  | p.Asp332Asn        | snv           | chr18      | 48591831       | 48591831     | G                | G/A            | c.994G>A         |             | COSM1389052 | 3418             | 434               | 12.7             |
|                                                                                                                                                                                                                                                                                                                                                                                                             | AMER1                                                                                                  | p.Gln1086Ter       | snv           | chrX       | 63409911       | 63409911     | G                | G/A            | c.3256C>T        |             |             | 194              | 26                | 13.4             |
|                                                                                                                                                                                                                                                                                                                                                                                                             | AMER1                                                                                                  | p.Asp376Val        | snv           | chrX       | 63412040       | 63412040     | T                | T/A            | c.1127A>T        |             |             | 2737             | 422               | 15.42            |
|                                                                                                                                                                                                                                                                                                                                                                                                             | AMER1                                                                                                  | p.Gly355Ala        | snv           | chrX       | 63412103       | 63412103     | C                | C/G            | c.1064G>C        |             |             | 3877             | 540               | 13.93            |
|                                                                                                                                                                                                                                                                                                                                                                                                             | AMER1                                                                                                  | p.Gly28GlufsTer25  | deletion      | chrX       | 63413085       | 63413085     | CT               | CT/C           | c.81delA         |             |             | 1272             | 143               | 11.24            |
| #22                                                                                                                                                                                                                                                                                                                                                                                                         | KIAA1804                                                                                               | p.Ala374Val        | snv           | chr1       | 233489687      | 233489687    | C                | C/T            | c.1121C>T        |             |             | 878              | 99                | 11.28            |
|                                                                                                                                                                                                                                                                                                                                                                                                             | CTNNB1                                                                                                 | p.Val175Phe        | snv           | chr3       | 41266852       | 41266852     | G                | T/T            | c.523G>T         |             |             | 5789             | 5750              | 99.33            |
|                                                                                                                                                                                                                                                                                                                                                                                                             | PIK3CA                                                                                                 | p.Cys420Arg        | snv           | chr3       | 178927980      | 178927980    | T                | C/C            | c.1258T>C        | rs121913272 | COSM267862  | 20925            | 20893             | 99.85            |
|                                                                                                                                                                                                                                                                                                                                                                                                             | APC                                                                                                    | p.Arg24Gln         | snv           | chr5       | 112090658      | 112090658    | G                | G/A            | c.71G>A          |             |             | 2264             | 343               | 15.15            |
|                                                                                                                                                                                                                                                                                                                                                                                                             | APC                                                                                                    | p.Arg805Ter        | snv           | chr5       | 112173704      | 112173704    | C                | C/T            | c.2413C>T        |             | COSM19058   | 9511             | 4523              | 47.56            |
|                                                                                                                                                                                                                                                                                                                                                                                                             | APC                                                                                                    | p.Lys1456Ter       | snv           | chr5       | 112175657      | 112175657    | A                | A/T            | c.4366A>T        |             |             | 507              | 396               | 78.11            |
|                                                                                                                                                                                                                                                                                                                                                                                                             | TCF7L2                                                                                                 | p.Leu413Val        | snv           | chr10      | 114912167      | 114912167    | C                | C/G            | c.1237C>G        |             |             | 3610             | 787               | 21.8             |
|                                                                                                                                                                                                                                                                                                                                                                                                             | KRAS                                                                                                   | p.Gly13Asp         | snv           | chr12      | 25398281       | 25398281     | C                | C/T            | c.38G>A          | rs112445441 | COSM1140132 | 8831             | 6176              | 69.94            |
|                                                                                                                                                                                                                                                                                                                                                                                                             | TP53                                                                                                   | p.Lys351Glu        | snv           | chr17      | 7573976        | 7573976      | T                | T/C            | c.1051A>G        | rs141402957 | COSM107991  | 218              | 33                | 15.14            |
|                                                                                                                                                                                                                                                                                                                                                                                                             | TP53                                                                                                   | c.559+1G>A         | snv           | chr17      | 7578370        | 7578370      | C                | T/T            | c.559+1G>A       |             | COSM131534  | 1444             | 1443              | 99.93            |
|                                                                                                                                                                                                                                                                                                                                                                                                             | SMAD4                                                                                                  | p.Leu536Arg        | snv           | chr18      | 48604785       | 48604785     | T                | G/G            | c.1607T>G        |             | COSM218563  | 7410             | 7400              | 99.87            |
|                                                                                                                                                                                                                                                                                                                                                                                                             | AMER1                                                                                                  | p.Arg586Ter        | snv           | chrX       | 63411411       | 63411411     | G                | G/A            | c.1756C>T        |             | COSM1468846 | 6879             | 4818              | 70.04            |
| #23                                                                                                                                                                                                                                                                                                                                                                                                         | CTNNB1                                                                                                 | p.Met553TrpfsTer17 | deletion      | chr3       | 41275759       | 41275759     | TC               | TC/T           | c.1655delC       |             |             | 314              | 45                | 14.33            |
|                                                                                                                                                                                                                                                                                                                                                                                                             | APC                                                                                                    | p.Lys2698Asn       | snv           | chr5       | 112179385      | 112179385    | A                | A/C            | c.8094A>C        |             |             | 13066            | 5841              | 44.7             |
|                                                                                                                                                                                                                                                                                                                                                                                                             | BRAF                                                                                                   | p.Val600Glu        | snv           | chr7       | 140453136      | 140453136    | A                | A/T            | c.1799T>A        | rs113488022 | COSM18443   | 20459            | 10274             | 50.22            |
|                                                                                                                                                                                                                                                                                                                                                                                                             | TP53                                                                                                   | p.Tyr220Cys        | snv           | chr17      | 7578190        | 7578190      | T                | T/C            | c.659A>G         | rs121912666 | COSM10758   | 18407            | 8512              | 46.24            |
|                                                                                                                                                                                                                                                                                                                                                                                                             | SMAD4                                                                                                  | p.Pro511Leu        | snv           | chr18      | 48604710       | 48604710     | C                | C/T            | c.1532C>T        |             |             | 4675             | 3332              | 71.27            |
| #24                                                                                                                                                                                                                                                                                                                                                                                                         | KIAA1804                                                                                               | p.Pro982Leu        | snv           | chr1       | 233518291      | 233518291    | C                | C/T            | c.2945C>T        | rs34794284  |             | 10226            | 2988              | 29.22            |
|                                                                                                                                                                                                                                                                                                                                                                                                             | PIK3CA                                                                                                 | p.Cys378Trp        | snv           | chr3       | 178922365      | 178922365    | T                | T/G            | c.1134T>G        |             | COSM1420801 | 16873            | 16617             | 98.48            |
|                                                                                                                                                                                                                                                                                                                                                                                                             | APC                                                                                                    | p.Gln1367Ter       | snv           | chr5       | 112175390      | 112175390    | C                | T/T            | c.4099C>T        | rs121913328 | COSM13121   | 10882            | 10796             | 99.21            |
|                                                                                                                                                                                                                                                                                                                                                                                                             | TP53                                                                                                   | p.Phe270Cys        | snv           | chr17      | 7577129        | 7577129      | A                | C/C            | c.809T>G         |             | COSM11305   | 1959             | 1953              | 99.69            |
| #25                                                                                                                                                                                                                                                                                                                                                                                                         | APC                                                                                                    | p.Ser1315Ter       | snv           | chr5       | 112175235      | 112175235    | C                | A/A            | c.3944C>A        |             | COSM18777   | 9992             | 9977              | 99.85            |
|                                                                                                                                                                                                                                                                                                                                                                                                             | TP53                                                                                                   | p.Tyr234Cys        | snv           | chr17      | 7577580        | 7577580      | T                | C/C            | c.701A>G         |             | COSM10725   | 2327             | 2327              | 100              |
| #26                                                                                                                                                                                                                                                                                                                                                                                                         | CTNNB1                                                                                                 | p.Pro606Ala        | snv           | chr3       | 41277852       | 41277852     | C                | C/G            | c.1816C>G        |             |             | 5387             | 2288              | 42.47            |
|                                                                                                                                                                                                                                                                                                                                                                                                             | PIK3CA                                                                                                 | p.Glu542Lys        | snv           | chr3       | 178936082      | 178936082    | G                | G/A            | c.1624G>A        | rs121913273 | COSM125369  | 1123             | 1038              | 92.43            |
|                                                                                                                                                                                                                                                                                                                                                                                                             | APC                                                                                                    | p.Thr182IlefsTer2  | deletion      | chr5       | 112116494      | 112116494    | TACAA            | TACAA/T        | c.540_543delACAA |             |             | 8951             | 4412              | 49.29            |
|                                                                                                                                                                                                                                                                                                                                                                                                             | APC                                                                                                    | p.Arg259Trp        | snv           | chr5       | 112137021      | 112137021    | C                | C/T            | c.775C>T         |             |             | 3804             | 2003              | 52.66            |
|                                                                                                                                                                                                                                                                                                                                                                                                             | APC                                                                                                    | p.Glu1284Ter       | snv           | chr5       | 112175141      | 112175141    | G                | G/T            | c.3850G>T        |             | COSM19069   | 9694             | 5754              | 59.36            |
|                                                                                                                                                                                                                                                                                                                                                                                                             | APC                                                                                                    | p.Glu1317Gln       | snv           | chr5       | 112175240      | 112175240    | G                | G/C            | c.3949G>C        | rs1801166   | COSM19099   | 15541            | 6937              | 44.64            |
|                                                                                                                                                                                                                                                                                                                                                                                                             | TCF7L2                                                                                                 | p.Leu200ProfsTer10 | insertion     | chr10      | 114900983      | 114900983    | A                | A/AC           | c.593_594insC    |             |             | 5042             | 2332              | 46.25            |
|                                                                                                                                                                                                                                                                                                                                                                                                             | SMAD4                                                                                                  | p.Arg361Cys        | snv           | chr18      | 48591918       | 48591918     | C                | T/T            | c.1081C>T        | rs80338963  | COSM1158192 | 9636             | 9585              | 99.47            |
| #27                                                                                                                                                                                                                                                                                                                                                                                                         | WT for all the 16 genes analyzed. A novel deep sequencing and a WES are ongoing to confirm this result |                    |               |            |                |              |                  |                |                  |             |             |                  |                   |                  |
| #28                                                                                                                                                                                                                                                                                                                                                                                                         | The deep sequencing is ongoing                                                                         |                    |               |            |                |              |                  |                |                  |             |             |                  |                   |                  |
| <sup>1</sup> Correspondence between the nomenclature of CRC-SC reported here (#n) and that reported in (1) (n): #1 = 11; #2 = 28; #3 = 8; #4 = 9; #5 = 1; #6 = 13; #7 = 20; #8 = 10; #9 = 15; #10 = 7; #11 = 25; #12 = 16; #14 = 2; #15 = 5; #16 = 23; #17 = 22; #19 = 26; #23 = 6; #24 = 18; #25 = 12                                                                                                      |                                                                                                        |                    |               |            |                |              |                  |                |                  |             |             |                  |                   |                  |
| 1. M. L. De Angelis, A. Zeuner, E. Policicchio, G. Russo, A. Bruselles, M. Signore, S. Vitale, G. De Luca, E. Pilozi, A. Boe, G. Stassi, L. Ricci-Vitiani, C. A. Amoreo, A. Pagliuca, F. Francescangeli, M. Tartaglia, R. De Maria, M. Baiocchi. Cancer stem cell-based models of colorectal cancer reveal molecular determinants of therapy resistance. Stem Cell Translational Medicine. In press (2016). |                                                                                                        |                    |               |            |                |              |                  |                |                  |             |             |                  |                   |                  |
