# Supplementary material for: CHK1-targeted therapy to deplete DNA replication-stressed, p53-deficient, hyperdiploid colorectal cancer stem cells
Source: PubMed Central journal article supplement — Gut. 2017 Apr 7;67(5):903–17. doi: 10.1136/gutjnl-2016-312623 (PMC5890648; doi:10.1136/gutjnl-2016-312623), 2017-04-07
Supplement: gutjnl-2016-312623supp004.pdf [file gutjnl-2016-312623supp004.pdf]

**TABLE S3. Classification of CRC-SCs according to the sensitivity to LY2606368**

| <b>High LY2606368 sensitivity</b> |                       |     | <b>Medium LY2606368 sensitivity</b> |                       |     | <b>Low LY2606368 sensitivity</b> |                       |        |
|-----------------------------------|-----------------------|-----|-------------------------------------|-----------------------|-----|----------------------------------|-----------------------|--------|
|                                   | IC <sub>50</sub> [nM] |     |                                     | IC <sub>50</sub> [nM] |     |                                  | IC <sub>50</sub> [nM] |        |
|                                   | 48h                   | 72h |                                     | 48h                   | 72h |                                  | 48h                   | 72h    |
| #1                                | 10                    | 5   | #19                                 | 146                   | 29  | #12                              | ≥ 1000                | 820    |
| #13                               | 11                    | 7   | SW480                               | 118                   | 45  | #15                              | ≥ 1000                | ≥ 1000 |
| #28                               | 19                    | 7   | #6                                  | 143                   | 32  | #5                               | ≥ 1000                | ≥ 1000 |
| #4                                | 29                    | 3   | #20                                 | 212                   | 28  | #8                               | ≥ 1000                | ≥ 1000 |
| #16                               | 28                    | 12  | #21                                 | 244                   | 19  | #10                              | ≥ 1000                | ≥ 1000 |
| #2                                | 37                    | 25  | DLD-1                               | 154                   | 79  | #7                               | ≥ 1000                | ≥ 1000 |
| #27                               | 45                    | 9   | #3                                  | 215                   | 85  | #26                              | ≥ 1000                | ≥ 1000 |
| #17                               | 49                    | 11  | HT-29                               | 249                   | 90  | HCT 116                          | ≥ 1000                | ≥ 1000 |
| #18                               | 63                    | 20  | #22                                 | 807                   | 139 |                                  |                       |        |
| SW620                             | 53                    | 38  | #14                                 | ≥ 1000                | 85  |                                  |                       |        |
| #9                                | 79                    | 18  | #23                                 | ≥ 1000                | 102 |                                  |                       |        |
|                                   |                       |     | #24                                 | ≥ 1000                | 141 |                                  |                       |        |
|                                   |                       |     | #25                                 | ≥ 1000                | 250 |                                  |                       |        |
|                                   |                       |     | #11                                 | ≥ 1000                | 173 |                                  |                       |        |
