# Supplementary material for: CHK1-targeted therapy to deplete DNA replication-stressed, p53-deficient, hyperdiploid colorectal cancer stem cells
Source: PubMed Central journal article supplement — Gut. 2017 Apr 7;67(5):903–17. doi: 10.1136/gutjnl-2016-312623 (PMC5890648; doi:10.1136/gutjnl-2016-312623), 2017-04-07
Supplement: gutjnl-2016-312623supp005.pdf [file gutjnl-2016-312623supp005.pdf]

**TABLE S4. List of the antibodies used in the study**

| Type     | Catalog # | Name                            | Company        |
|----------|-----------|---------------------------------|----------------|
| phospho- | 9565      | Catenin (beta) (T41/S45)        | Cell Signaling |
| phospho- | 2661      | Chk2 (Thr68)                    | Cell Signaling |
| phospho- | 2696      | B-Raf (S445)                    | Cell Signaling |
| phospho- | 9128      | MEK1 (S298)                     | Cell Signaling |
| cleaved  | 9541      | PARP, cleaved (D214)            | Cell Signaling |
| phospho- | 9718      | Histone H2A.X (Ser139) (20E3)   | Cell Signaling |
| total    | 2947      | p21 Waf1/Cip1 (12D1)            | Cell Signaling |
| phospho- | 9511      | Smad1 (S/S)/Smad5 (S/S)/Smad8   | Cell Signaling |
| phospho- | 2215      | S6 Ribosomal Protein (S240/244) | Cell Signaling |
| total    | 9552      | PTEN                            | Cell Signaling |
| phospho- | 9271      | AKT (S473)                      | Cell Signaling |
| phospho- | 9491      | Caspase-7, cleaved (D198)       | Cell Signaling |
| total    | 4824      | p16 INK4A                       | Cell Signaling |
| phospho- | 9451      | 4E-BP1 (S65)                    | Cell Signaling |
| phospho- | 558400    | PLK1 (T210)                     | BD             |
| phospho- | 9464      | FoxO1 (T24)/FoxO3a (T32)        | Cell Signaling |
| phospho- | 3614      | Tuberin/TSC2 (Y1571)            | Cell Signaling |
| total    | 3814      | Bak                             | Cell Signaling |
| phospho- | 9284      | p53 (S15)                       | Cell Signaling |
| total    | 611194    | Aldehyde Dehydrogenase (ALDH)   | BD             |
| phospho- | 9275      | AKT (T308)                      | Cell Signaling |
| phospho- | 2971      | mTOR (S2448)                    | Cell Signaling |
| total    | 4135      | Cyclin B1 (V152)                | Cell Signaling |
| phospho- | 9661      | Caspase-3, cleaved (D175)       | Cell Signaling |
| phospho- | 3590      | Rb (S780)                       | Cell Signaling |
| phospho- | 9421      | c-Raf (S259)                    | Cell Signaling |
| phospho- | 9455      | 4E-BP1 (T70)                    | Cell Signaling |
| phospho- | 9291      | Bad (S112)                      | Cell Signaling |
| phospho- | 2821      | PLCgamma1 (Y783)                | Cell Signaling |
| phospho- | 9101      | ERK 1/2 (p44/42 MAPK) (T202/Y   | Cell Signaling |
| phospho- | 2441      | eIF4G (S1108)                   | Cell Signaling |
| phospho- | 4539      | CDC2 (Tyr15)                    | Cell Signaling |
| phospho- | 9251      | SAPK/JNK (T183/Y185)            | Cell Signaling |
| phospho- | 4184      | AMPKalpha1 (S485)               | Cell Signaling |
| phospho- | 9121      | MEK1/2 (S217/221)               | Cell Signaling |
| phospho- | 9295      | Bad (S136)                      | Cell Signaling |
| phospho- | A300-245A | RPA32 (S4/8)                    | Bethyl         |
| phospho- | 2853      | ATR (Ser428)                    | Cell Signaling |
| phospho- | 2914      | Aurora A (T288)/B (T232)/C (T19 | Cell Signaling |
| total    | 610203    | Cox-2 (33)                      | BD             |
| total    | 5741      | Vimentin xp                     | Cell Signaling |
| phospho- | 3031      | NF-kappaB p65 (S536)            | Cell Signaling |
| phospho- | 9211      | p38 MAPK (T180/Y182)            | Cell Signaling |
| phospho- | 9205      | p70 S6K (T389)                  | Cell Signaling |
| total    | 2772      | Bax                             | Cell Signaling |
| phospho- | 2348      | Chk1 (S345)                     | Cell Signaling |
| phospho- | 9461      | FoxO1 (S256)                    | Cell Signaling |
| total    | 3195      | E-Cadherin                      | Cell Signaling |
| phospho- | 3061      | PDK1 (S241)                     | Cell Signaling |
| phospho- | 9297      | Bad (S155)                      | Cell Signaling |
| phospho- | 3521      | MDM2 Ser166                     | Cell Signaling |
| total    | 3377      | Histone H3 (Ser10) (D2C8)XP     | Cell Signaling |
| total    | 2926      | Cyclin D1 (DCS6)                | Cell Signaling |
| phospho- | 9561      | Catenin (beta) (S33/37/T41)     | Cell Signaling |
| phospho- | 4910s     | WEE1 S642(D47G5)                | Cell Signaling |
| phospho- | 2521      | p53_Ser46                       | Cell Signaling |
| phospho- | ab109394  | RPA32 (T21)                     | Abcam          |
| phospho- | 12302     | Chk1 (S317)                     | Cell Signaling |
| phospho- | 9505      | Caspase-9, cleaved (D315)       | Cell Signaling |
| total    | 2936      | CyclinD3                        | Cell Signaling |
| total    | 610241    | Kip1/p27 (57)                   | BD             |
| phospho- | ab81292   | ATM S1981                       | ABCAM          |
| total    | 2762      | Bcl-xL                          | Cell Signaling |
| total    | 4656      | Cyclin A (BF683)                | Cell Signaling |
| phospho- | 4901      | CDC25C (Ser216)                 | Cell Signaling |
| cleaved  | 2121      | Fodrin (alpha), cleaved (D1185) | Cell Signaling |
| phospho- | 9246      | IkappaB-alpha (S32/36) (5A5)    | Cell Signaling |
| total    | 4967      | Actin, Beta                     | Cell Signaling |
| phospho- | 9741      | eIF4E (S209)                    | Cell Signaling |
| phospho- | 4181      | AMPKbeta1 (S108)                | Cell Signaling |
| total    | 2872      | Bcl-2                           | Cell Signaling |
| phospho- | 9331      | GSK-3alpha/beta (S21/9)         | Cell Signaling |
