# Supplementary material for: CHK1-targeted therapy to deplete DNA replication-stressed, p53-deficient, hyperdiploid colorectal cancer stem cells
Source: PubMed Central journal article supplement — Gut. 2017 Apr 7;67(5):903–17. doi: 10.1136/gutjnl-2016-312623 (PMC5890648; doi:10.1136/gutjnl-2016-312623), 2017-04-07
Supplement: gutjnl-2016-312623supp006.pdf [file gutjnl-2016-312623supp006.pdf]

**TABLE S5:** ATM status of a panel of CRC-SCs as evaluated by whole exome sequencing (WES)<sup>1</sup>

| Cell line | ATM     |
|-----------|---------|
| #1        |         |
| #2        |         |
| #4        |         |
| #9        |         |
| #16       |         |
| #17       |         |
| #24       |         |
| #25       |         |
| #3        |         |
| #6        | R692H   |
| #11       | D1837fs |
| #12       |         |
| #5        | S2489F  |
| #7        | R1489C  |
| #8        | A1812D  |
| #10       | P2271S  |

  

|                |
|----------------|
| Wild-type      |
| Heterozygous   |
| Homozygous     |
| fs, frameshift |

<sup>1</sup>WES analysis was performed in a selected number of samples as a starting analysis to fully characterize these CRC-SCs upon CRC-SC isolation and before their amplification in the context of the BioBank, so before performing RPPA and western blot.
